# Supplementary material for: ANGPTL8 reverses established adriamycin cardiomyopathy by stimulating adult cardiac progenitor cells
Source: PubMed Central journal article supplement (PMC5348328; doi:10.18632/oncotarget.13061), 2016-11-03
Supplement: oncotarget-07-80391-s001.pdf [file oncotarget-07-80391-s001.pdf]

# ANGPTL8 reverses established adriamycin cardiomyopathy by stimulating adult cardiac progenitor cells

## Supplementary Material

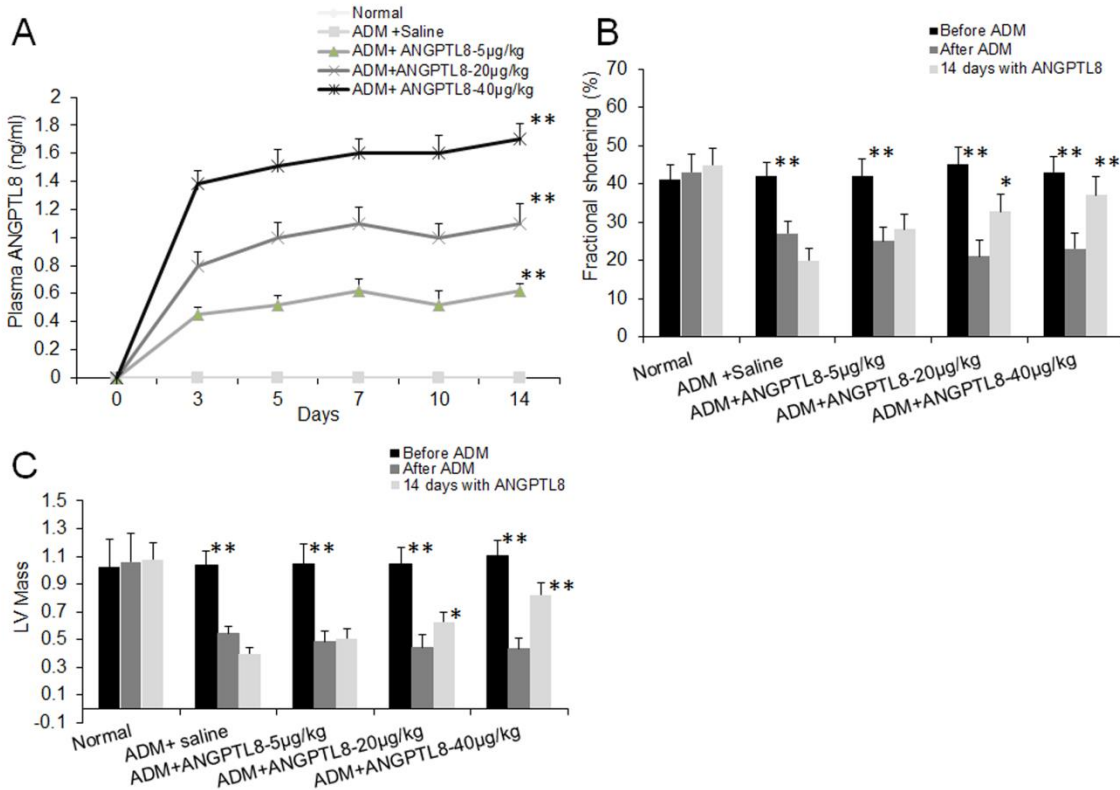

**Supplemental Figure 1. ANGPTL8 protein intramuscular injection reversed established ADM cardiomyopathy.** (A) a graphic of fasting plasma human *ANGPTL8* levels. In normal and ADM + saline inject, human *ANGPTL8* was not detectable. Values are presented as mean  $\pm$  SEM.  $n = 3$  per group;  $**P < 0.001$  vs control groups. ANGPTL8 protein injection at doses of 5µg-20µg-40µg/kg/day for 14 days; (B) a graphic of fractional shortening, (C) a graphic of LV mass, Values are presented as mean  $\pm$  SEM.  $n = 3$  per group;  $**P < 0.001$  and  $* < 0.05$  vs after ADM.

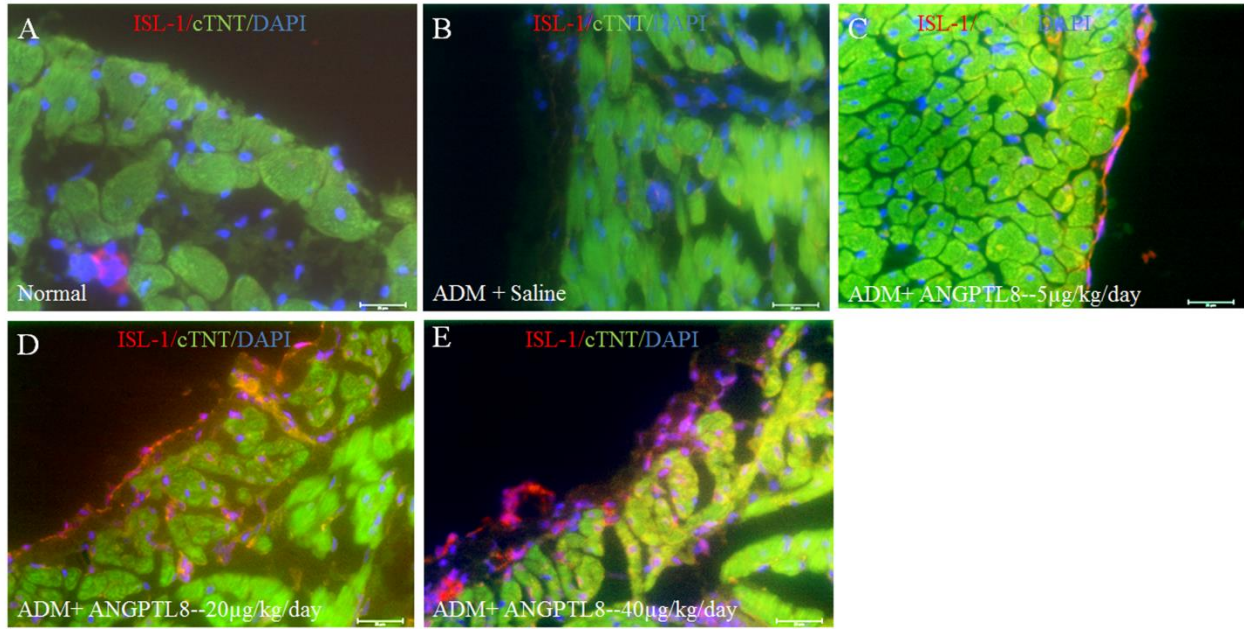

**Supplemental Figure 2. ANGPTL8 protein therapy inducing the activation of ISL-1 (an early cardiac muscle differentiation marker) in epicardium and sub-epicardial layer. (A)** normal rat heart, **(B)** ADM + Saline injection, **(C)** ADM plus ANGPTL8 protein 5 µg/kg/day for 14 days, **(D)** ADM plus ANGPTL8 protein 20 µg/kg/day for 14 days, **(E)** ADM plus ANGPTL8 protein 40 µg/kg/day for 14 days. Scale bar is 25 µm.

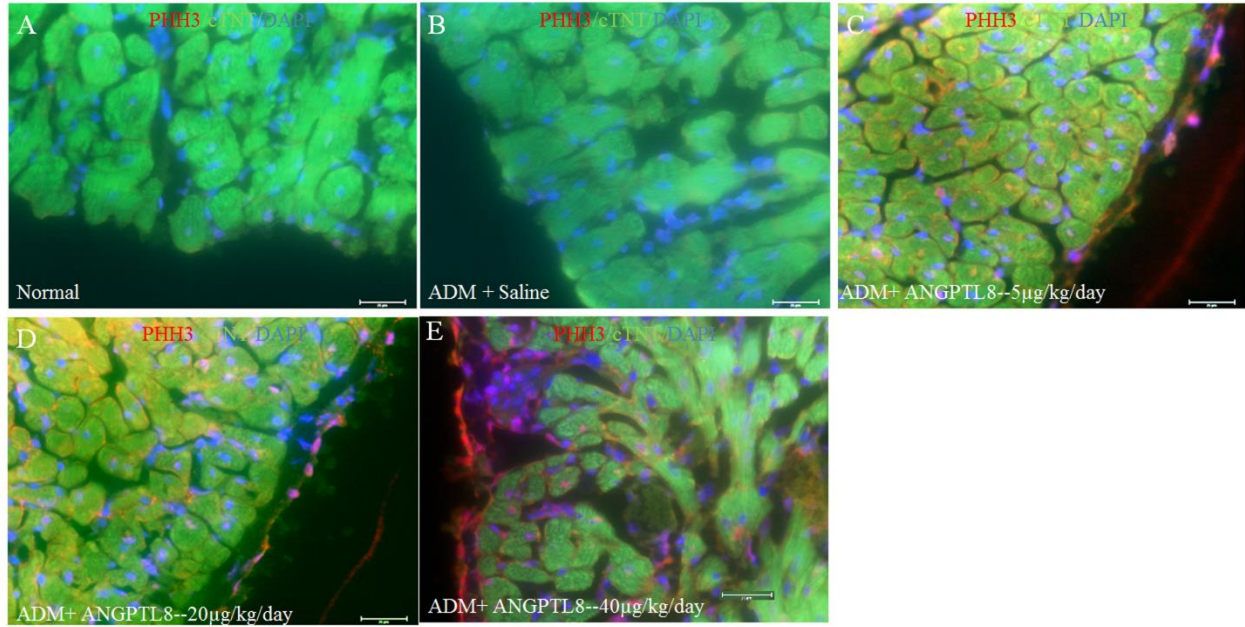

**Supplemental Figure 3. Phospho-histone H3 (PHH3) staining shown some epicardial cells and sub-epicardial cardiac muscle cells are in proliferation after ANGPTL8 protein therapy. (A) normal rat heart, (B) ADM + Saline injection, (C) ADM plus ANGPTL8 protein 5 µg/kg/day for 14 days, (D) ADM plus ANGPTL8 protein 20 µg/kg/day for 14 days, (E) ADM plus ANGPTL8 protein 40 µg/kg/day for 14 days. Scale bar is 25 µm.**

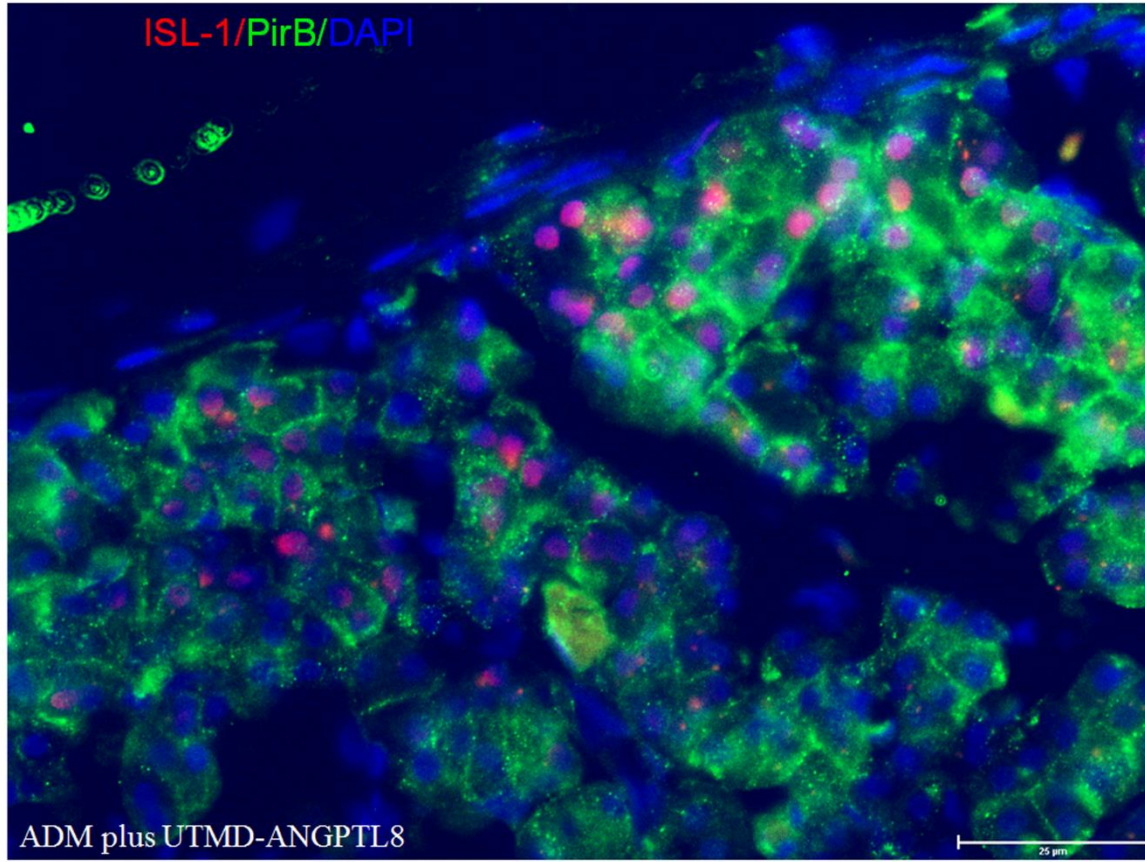

**Supplemental Figure 4. PirB distributed in membrane of ISL-1 positive cardiac progenitor cells. Scale bar is 25 µm.**

## Mechanism of Action of *ANGPTL8* on Myocardial Regeneration

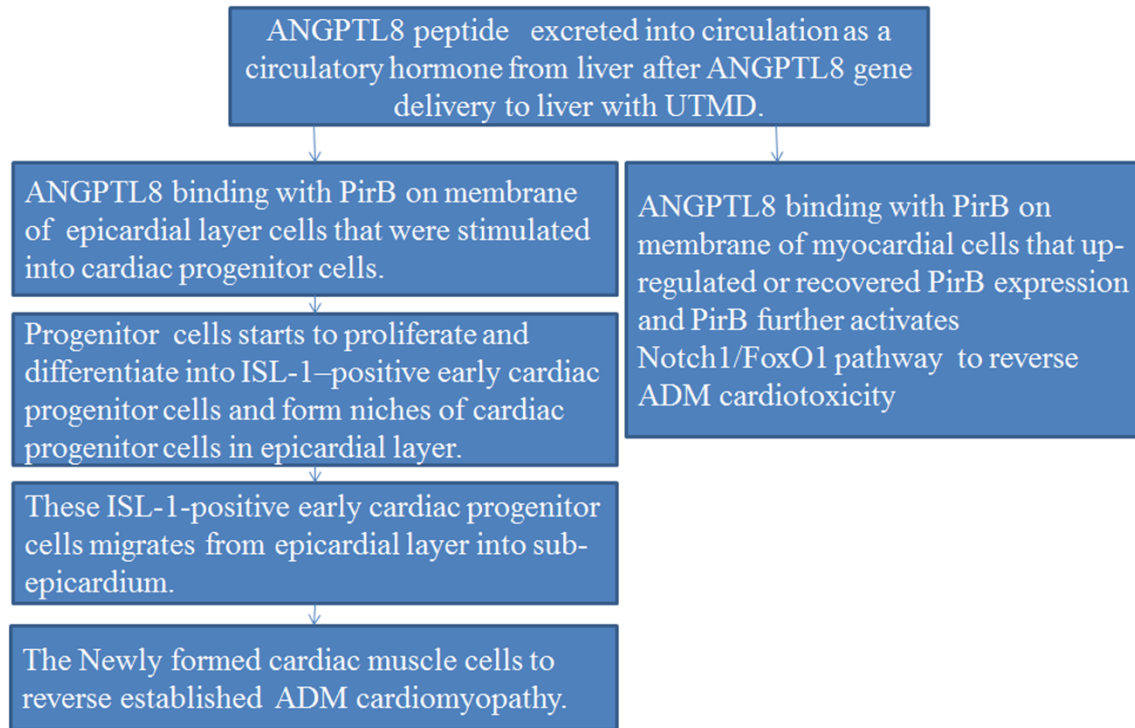

**Supplemental Figure 5. Schematic indicating mechanism of action of ANGPTL8 on myocardial regeneration.**
